# Supplementary material for: Bovine Astrovirus—A Comprehensive Review
Source: MDPI journal article supplement (doi:10.3390/v14061217), 2022-06-02
Supplement: s1 [file s1]

**Table S1.** The reference AstV strains used in this study.

| Strains name                  | Hosts                     | GenBank accession no. | Symptom  | Collection date | Countries |
|-------------------------------|---------------------------|-----------------------|----------|-----------------|-----------|
| B18/HK                        | Bovine                    | HQ916313              | Normal   | 2011            | China     |
| B170/HK                       | Bovine                    | HQ916314              | Normal   | 2011            | China     |
| B34/HK                        | Bovine                    | HQ916315              | Normal   | 2011            | China     |
| BoAstV-GX-J27                 | Bovine                    | KJ476832              | Diarrhea | 2013            | China     |
| BoAstV-GX-G1                  | Bovine                    | KJ476833              | Diarrhea | 2013            | China     |
| BoAstV-GX-J7                  | Bovine                    | KJ476834              | Diarrhea | 2013            | China     |
| BoAstV-GX-J22                 | Bovine                    | KJ476835              | Diarrhea | 2013            | China     |
| BoAstV-GX7/CHN/2014           | Bovine                    | KJ620979              | Diarrhea | 2014            | China     |
| HMO-CLondon2                  | Human                     | KJ920197              | Normal   | 2010            | USA       |
| Takin astrovirus              | Sichuan takin             | NC_037655             | Normal   | 2013            | China     |
| DA06                          | Duck                      | FJ919225              | Unknown  | 2016            | China     |
| CHN/2017/44                   | Canis lupus<br>familiaris | MF973500              | Diarrhea | 2017            | China     |
| BoAstV/JPN/Hokkaido11-7/2009  | Bovine                    | LC047789              | Diarrhea | 2009            | Japan     |
| BoAstV/JPN/Hokkaido11-55/2009 | Bovine                    | LC047790              | Diarrhea | 2009            | Japan     |
| BoAstV/JPN/Hokkaido12-7/2009  | Bovine                    | LC047791              | Diarrhea | 2009            | Japan     |
| BoAstV/JPN/Hokkaido12-18/2009 | Bovine                    | LC047792              | Diarrhea | 2009            | Japan     |
| BoAstV/JPN/Hokkaido12-25/2009 | Bovine                    | LC047793              | Diarrhea | 2009            | Japan     |
| BoAstV/JPN/Hokkaido12-27      | Bovine                    | LC047794              | Diarrhea | 2009            | Japan     |
| BoAstV/JPN/Ishikawa24-6/2013  | Bovine                    | LC047787              | Normal   | 2013            | Japan     |
| BoAstV/JPN/Ishikawa9728/2013  | Bovine                    | LC047788              | Normal   | 2013            | Japan     |
| BoAstV/JPN/Kagoshima1-2/2014  | Bovine                    | LC047795              | Normal   | 2014            | Japan     |
| BoAstV/JPN/Kagoshima1-7/2014  | Bovine                    | LC047796              | Diarrhea | 2014            | Japan     |

|                                                 |          |          |                        |      |             |
|-------------------------------------------------|----------|----------|------------------------|------|-------------|
| BoAstV/JPN/Kagoshima2-3-1/2015                  | Bovine   | LC047797 | Diarrhea               | 2015 | Japan       |
| BoAstV/JPN/Kagoshima2-3-2/2015                  | Bovine   | LC047798 | Diarrhea               | 2015 | Japan       |
| BoAstV/JPN/Kagoshima2-24/2015                   | Bovine   | LC047799 | Diarrhea               | 2015 | Japan       |
| BoAstV/JPN/Kagoshima2-52/2015                   | Bovine   | LC047801 | Diarrhea               | 2015 | Japan       |
| BoAstV/JPN/Kagoshima2-38/2015                   | Bovine   | LC047800 | Diarrhea               | 2015 | Japan       |
| BoAstV/JPN/KagoshimaSR28-462/2016               | Bovine   | LC341267 | Diarrhea               | 2016 | Japan       |
| PoAstV-2/JPN/Bu5-10-1/2014                      | Porcine  | LC201585 | Normal                 | 2014 | Japan       |
| PoAstV-3/JPN/Bu2-5/2014                         | Porcine  | LC201595 | Normal                 | 2014 | Japan       |
| PoAstV-4/JPN/Bu5-10-2/2014                      | Porcine  | LC201603 | Normal                 | 2014 | Japan       |
| PoAstV-5/JPN/Ishi-Im1-2/2015                    | Porcine  | LC201620 | Normal                 | 2015 | Japan       |
| Bovine astrovirus NeuroS1                       | Bovine   | KF233994 | Encephalitis           | 2011 | USA         |
| BSRI-1                                          | Bovine   | KP264970 | Respiratory<br>disease | 2013 | USA         |
| 9715                                            | Sea lion | JN420358 | Normal                 | 2010 | USA         |
| FAstV-D1                                        | Feline   | KM017741 | Unknown                | 2013 | USA         |
| MAstV/Bov/ITA/2012/715                          | Bovine   | KT963071 | Diarrhea               | 2012 | Italy       |
| BoAstV-Neuro-Uy                                 | Bovine   | MK386569 | Encephalitis           | 2018 | Uruguay     |
| LVMS2704                                        | Bovine   | MN200263 | Unknown                | 2016 | Uruguay     |
| CH13                                            | Bovine   | KM035759 | Encephalitis           | 2012 | Switzerland |
| Bovine astrovirus CH13/NeuroS1<br>isolate 26875 | Bovine   | KX266903 | Encephalitis           | 2015 | Switzerland |
| Bovine astrovirus CH13/NeuroS1<br>isolate 36716 | Bovine   | KX266904 | Encephalitis           | 2015 | Switzerland |
| Bovine astrovirus CH13/NeuroS1<br>isolate 23985 | Bovine   | KX266905 | Encephalitis           | 2015 | Switzerland |
| Bovine astrovirus CH13/NeuroS1                  | Bovine   | KX266907 | Encephalitis           | 2015 | Switzerland |

|                                        |          |          |              |      |             |
|----------------------------------------|----------|----------|--------------|------|-------------|
| isolate 43661                          |          |          |              |      |             |
| Bovine astrovirus CH13/NeuroS1         | Bovine   | KX266908 | Encephalitis | 2015 | Switzerland |
| isolate 43660                          |          |          |              |      |             |
| Bovine astrovirus CH13/NeuroS1         | Bovine   | KX266902 | Encephalitis | 2015 | Switzerland |
| isolate 26730                          |          |          |              |      |             |
| Bovine astrovirus CH13/NeuroS1         | Bovine   | KX266906 | Encephalitis | 2015 | Switzerland |
| isolate 42799                          |          |          |              |      |             |
| Bovine astrovirus CH13/NeuroS1 isolate | Bovine   | KX266906 | Encephalitis | 2015 | Switzerland |
| 23871                                  |          |          |              |      |             |
| CH15                                   | Bovine   | KT956903 | Unknown      | 2015 | Switzerland |
| BoAstV-VC34/338                        | Bovine   | MK987099 | Encephalitis | 2016 | Switzerland |
| BoAstV-VC34/346                        | Bovine   | MK987100 | Encephalitis | 2016 | Switzerland |
| BoAstV-VC65/698                        | Bovine   | MK987103 | Encephalitis | 2016 | Switzerland |
| BoAstV-VC34/375                        | Bovine   | MK987101 | Encephalitis | 2016 | Switzerland |
| BoAstV-VC65/693                        | Bovine   | MK987102 | Encephalitis | 2016 | Switzerland |
| MOxAstV-CH18                           | Ovibos   | MK211323 | Unknown      | 1982 | Switzerland |
| CH16                                   | Sheep    | KY859988 | Encephalitis | 2006 | Switzerland |
| CcAstV/roe_deer/SLO/D5-14/2014         | Roe deer | MN150124 | Normal       | 2014 | Slovenia    |
| CcAstV/roe_deer/SLO/D12-14/2014        | Roe deer | MN150125 | Normal       | 2014 | Slovenia    |
| OAstV-2/Hungary/2009                   | Sheep    | JN592482 | Normal       | 2009 | Hungary     |
| Hu/Nyergesujfalu/HUN4520/2010/HUN      | Human    | HQ398856 | Diarrhea     | 2010 | Hungary     |
| UK/2013/ewe/lib01454                   | Sheep    | LT706531 | Unknown      | 2013 | UK          |
| UK/2014/lamb/lib01454                  | Sheep    | LT706530 | Unknown      | 2014 | UK          |
| ANV-2-VF07-13-7_UK_2007                | Avian    | HQ330482 | Unknown      | 2007 | UK          |
| BH89/14                                | Bovine   | LN879482 | Encephalitis | 2014 | Germany     |
| BtnMLB1-40                             | Human    | AB823731 | Diarrhea     | 2010 | Bhutan      |

|                     |         |          |          |      |                    |      |
|---------------------|---------|----------|----------|------|--------------------|------|
| DcAstV-274          | Camelus | KR868724 | Unknown  | 2013 | United<br>Emirates | Arab |
| Bat-AsV/P02         | Bat     | MG693176 | Normal   | 2013 | Cameroon           |      |
| Sheep astrovirus    | Sheep   | Y15937   | Unknown  | 1997 | Norway             |      |
| Mink astrovirus     | Mink    | AY179509 | Normal   | 2002 | Unknown            |      |
| BAstV-GX27/CHN/2014 | Bovine  | KJ620980 | Diarrhea | 2014 | China              |      |
| LVMS681             | Bovine  | MN200262 | Unknown  | 2015 | Uruguay            |      |
